# Supplementary material for: Community-driven development of a modified progression-free survival ratio for precision oncology
Source: PubMed Central journal article supplement — ESMO Open. 2019 Nov 13;4(6):e000583. doi: 10.1136/esmoopen-2019-000583 (PMC6863673; doi:10.1136/esmoopen-2019-000583), 2019-11-13
Supplement: esmoopen-2019-000583supp003.pdf [file esmoopen-2019-000583supp003.pdf]

## 346 APPENDIX

## 347 DKTK MASTER Network (alphabetical order):

348 Leonidas Apostolidis<sup>2</sup>, Marinela Augustin<sup>16</sup>, Daniela Aust<sup>17</sup>, Irfan Ahmed Bhatti<sup>2</sup>, Johannes  
 349 Bloehdorn<sup>18</sup>, Cornelia Brendel<sup>19</sup>, Christian Britschgi<sup>20</sup>, Jan Braess<sup>21</sup>, Stefan Burdach<sup>22,23,24</sup>,  
 350 Elena Busch<sup>2</sup>, Jozefina Casuscelli<sup>25</sup>, Alexander Desuki<sup>26</sup>, Thomas Deutsch<sup>27</sup>, Mareike Dietrich<sup>2</sup>,  
 351 Ursula Ehmer<sup>28</sup>, Thomas J. Ettrich<sup>29</sup>, Johanna Falkenhorst<sup>30</sup>, Tanja Fehm<sup>31</sup>, Anne Flörcken<sup>32</sup>,  
 352 Andrea Forschner<sup>33</sup>, Stefan Fuxius<sup>34</sup>, Maria Gonzales-Carmona<sup>35</sup>, Frank Griesinger<sup>36</sup>, Sabine  
 353 Grill<sup>37</sup>, Stefan Gröschel<sup>3,38,39</sup>, Georg Martin Haag<sup>2</sup>, Ulrich Haag<sup>40</sup>, Niels Halama<sup>2,41,42</sup>, Holger  
 354 Hebart<sup>43</sup>, Nina Heidger<sup>44</sup>, Barbara Hermes<sup>45</sup>, Georg Hess<sup>26,54</sup>, Simone Hettmer<sup>46</sup>, Manuela  
 355 Hoehstetter<sup>47</sup>, Martin Hoffmann<sup>48</sup>, Felix J. Hüttner<sup>49</sup>, Anna L. Illert<sup>50,51</sup>, Maximilian Jenzer<sup>2</sup>,  
 356 Bernd Kasper<sup>52</sup>, Stefan Kasper-Virchow<sup>53</sup>, Thomas Kindler<sup>26,54</sup>, Ewa Koscielniak<sup>55</sup>, Jan  
 357 Krönke<sup>18</sup>, Michael Kühn<sup>26,54</sup>, Volker Kunzmann<sup>56</sup>, Alois Lang<sup>57</sup>, Jonas Leichsenring<sup>12</sup>, Elisabeth  
 358 Livingstone<sup>58</sup>, Lucia Liotta<sup>28</sup>, Kim Luley<sup>59</sup>, Elisabeth Mack<sup>19</sup>, Uwe M. Martens<sup>60</sup>, Klaus Metzeler<sup>61</sup>,  
 359 Jan Moritz Middeke<sup>62</sup>, Lino Möhrmann<sup>7,8</sup>, Roopa Jayarama-Naidu<sup>20</sup>, Ulrich-Frank Pape<sup>63</sup>, Lukas  
 360 Perkhofer<sup>29</sup>, Arne Pfeufer<sup>64,65</sup>, Constantin Pixberg<sup>2</sup>, Michael Quante<sup>28</sup>, Bernhard Rendenbach<sup>66</sup>,  
 361 Damian Rieke<sup>67</sup>, Christian Rothermundt<sup>68</sup>, Andre Norbert Sagerer<sup>69</sup>, Martin Salzmann<sup>70</sup>, Dieter  
 362 Saur<sup>28</sup>, Bastian Schilling<sup>71</sup>, Jan Schleicher<sup>72</sup>, Anke Schlenska-Lange<sup>21</sup>, Thomas Schmidt<sup>49</sup>,  
 363 Sophia Schmitz<sup>73</sup>, Sebastian Schölch<sup>74</sup>, Rajiv Shah<sup>75</sup>, Khalid Shoumariyeh<sup>50</sup>, Alexander  
 364 Siebenhüner<sup>20</sup>, Martin Singh<sup>2</sup>, Jens Siveke<sup>76</sup>, Christoph Springfield<sup>2</sup>, Helen Starke<sup>2</sup>, Sophia  
 365 Strobel<sup>70</sup>, Veronica Teleanu<sup>18</sup>, Niklas Thon<sup>77</sup>, Sebastian Wagner<sup>78</sup>, Thomas Walle<sup>2</sup>, Benedikt  
 366 Westphalen<sup>61</sup>, Bettina Whitlock<sup>79</sup>, Eva Winkler<sup>2</sup>, Naita Maren Wirsik<sup>49</sup>, Lena Woydack<sup>2</sup>, Angelika  
 367 Zabel-du Bois<sup>80</sup>, Stefanie Zschäbitz<sup>2</sup>

- 370 <sup>16</sup> Department of Hematology and Oncology, Paracelsus Medical University, Nuremberg,  
 371 Germany
- 372 <sup>17</sup> Institute of Pathology, Medical Faculty Carl Gustav Carus, Technische Universität Dresden,  
 373 Dresden, Germany
- 374 <sup>18</sup> Department of Internal Medicine III, University of Ulm, Ulm, Germany
- 375 <sup>19</sup> Department of Hematology, Oncology and Immunology, University Hospital Gießen and  
 376 Marburg, Marburg, Germany
- 377 <sup>20</sup> Department of Medical Oncology and Hematology, University Hospital Zurich, University of  
 378 Zurich, Comprehensive Cancer Center Zurich, Zurich Switzerland
- 379 <sup>21</sup> Department of Hematology and Oncology, Krankenhaus Barmherzige Brüder Regensburg,  
 380 Regensburg, Germany
- 381 <sup>22</sup> Department of Pediatrics and Children's Cancer Research Center, Kinderklinik München  
 382 Schwabing, Technical University of Munich School of Medicine, Munich, Germany
- 383 <sup>23</sup> CCC München – Comprehensive Cancer Center, Munich, Germany
- 384 <sup>24</sup> German Cancer Consortium (DKTK), Munich, Germany
- 385 <sup>25</sup> Department of Urology, Ludwig Maximilian University, Munich, Germany
- 386 <sup>26</sup> Department of Hematology, Medical Oncology and Pneumology, University Cancer Center  
 387 Mainz, Germany
- 388 <sup>27</sup> Department of Gynecology and Obstetrics, Heidelberg University Hospital, Heidelberg,  
 389 Germany
- 390 <sup>28</sup> Department of Medicine II, Klinikum rechts der Isar, Technische Universität München,  
 391 Munich, Germany

- 1  
2  
3 392 29 Department of Internal Medicine I, Ulm University Hospital, Ulm, Germany  
4 393 30 Sarcoma Center, West German Cancer Center, University Hospital Essen, University of  
5 394 Duisburg-Essen, Essen, Germany  
6 395 31 Department of Gynecology and Obstetrics, Düsseldorf University Hospital, Düsseldorf,  
7 396 Germany  
8 397 32 Charité-Universitätsmedizin Berlin, corporate member of Freie Universität Berlin, Humboldt-  
9 398 Universität zu Berlin, and Berlin Institute of Health, Department of Hematology, Oncology,  
10 399 and Tumor Immunology, Campus Virchow-Klinikum, Berlin, Germany  
11 400 33 Center for Dermatoooncology, Department of Dermatology, University Hospital Tuebingen,  
12 401 Tuebingen, Germany  
13 402 34 Onkologische Schwerpunktpraxis Heidelberg, Dres. Karcher, Fuxius, Debatin, Heidelberg,  
14 403 Germany  
15 404 35 Department of Internal Medicine I, University Hospital Bonn, Bonn, Germany  
16 405 36 Department of Hematology and Oncology, Pius-Hospital, University Medicine Oldenburg,  
17 406 Oldenburg, Germany  
18 407 37 Department of Gynecology and Center for Hereditary Breast and Ovarian Cancer, University  
19 408 Hospital rechts der Isar, Technical University of Munich (TUM), Munich, Germany  
20 409 38 Department of Internal Medicine V, Heidelberg University Hospital, Heidelberg, Germany  
21 410 39 Molecular Leukemogenesis Group, DKFZ, Heidelberg, Germany  
22 411 40 Department of Urology, Kliniken Nagold, Nagold, Germany  
23 412 41 Department of Translational Immunotherapy, DKFZ, Heidelberg, Germany  
24 413 42 Institute of Immunology, University of Heidelberg, Heidelberg, Germany  
25 414 43 Department of Internal Medicine, Stauferklinikum Schwäbisch Gmünd, Mutlangen, Germany  
26 415 44 Department of Urology, Krankenhaus der Barmherzigen Brüder Trier, Trier, Germany  
27 416 45 Department of Internal Medicine VIII, University Hospital Tuebingen, Tuebingen, Germany  
28 417 46 Division of Pediatric Hematology and Oncology, Department of Pediatric and Adolescent  
29 418 Medicine, Faculty of Medicine, University of Freiburg, Freiburg, Germany  
30 419 47 Department of Hematology, Oncology, Immunology, Palliative Care, Infectious Diseases and  
31 420 Tropical Medicine, München Klinik Schwabing, Munich, Germany  
32 421 48 Department of Internal Medicine A, Klinikum Ludwigshafen, Ludwigshafen, Germany  
33 422 49 Department of General, Visceral and Transplantation Surgery, University of Heidelberg,  
34 423 Heidelberg, Germany  
35 424 50 Department of Hematology, Oncology and Stem Cell Transplantation, Medical Center,  
36 425 Faculty of Medicine, Freiburg, Germany  
37 426 51 DKTK, Freiburg, Germany  
38 427 52 Sarcoma Unit, Interdisciplinary Tumor Center, Mannheim University Medical Center,  
39 428 University of Heidelberg, Mannheim, Germany  
40 429 53 Department of Medical Oncology, West German Cancer Center, University Hospital Essen,  
41 430 University Duisburg-Essen, Essen, Germany  
42 431 54 University Cancer Center Mainz, Germany  
43 432 55 Department of Pediatrics, Olgahospital, Klinikum Stuttgart, Stuttgart, Germany  
44 433 56 Department of Internal Medicine II, University Hospital Würzburg, Comprehensive Cancer  
45 434 Center Mainfranken, Würzburg  
46 435 57 Division of Oncology, Department of Internal Medicine, Rotkreuzklinik Lindenberg,  
47  
48  
49  
50  
51  
52  
53  
54  
55  
56  
57  
58  
59  
60

1  
2  
3 436 Lindenberg, Germany  
4 437 58 Department of Dermatology, University Hospital Essen, University of Duisburg-Essen,  
5 438 Essen, Germany  
6 439 59 Department of Hematology and Oncology, University Hospital Schleswig-Holstein, Campus  
7 440 Lübeck, Lübeck, Germany  
8 441 60 SLK-Clinics, Cancer Center Heilbronn-Franken, Heilbronn, Germany  
9 442 61 Department of Internal Medicine III, University Hospital, LMU Munich and Comprehensive  
10 443 Cancer Center, Munich, Germany  
11 444 62 Department of Internal Medicine I, University Hospital Carl Gustav Carus Dresden, Technical  
12 445 University Dresden, Dresden, Germany  
13 446 63 Department of Gastroenterology and Hepatology, Campus Virchow Clinic and Charité Mitte,  
14 447 Charité University Medicine Berlin, Berlin, Germany & Asklepios Klinik St. Georg, Asklepios  
15 448 Kliniken Hamburg GmbH, Hamburg, Germany  
16 449 64 Department of Pediatrics, Dr. von Hauner Children's Hospital, University Hospital, LMU  
17 450 Munich, Munich, Germany  
18 451 65 Praxis Humangenetik im Zentrum, Munich, Germany  
19 452 66 Praxis Drs. Rendenbach, Laubenstein, Becker, Trier, Germany  
20 453 67 Department of Hematology and Oncology, Charité – Universitätsmedizin Berlin, corporate  
21 454 member of Freie Universität Berlin, Humboldt-Universität zu Berlin, Charité Comprehensive  
22 455 Cancer Center and Berlin Institute of Health, Berlin, Germany  
23 456 68 Department of Medical Oncology and Hematology, Kantonsspital St. Gallen, St. Gallen,  
24 457 Switzerland  
25 458 69 Department of Neurosurgery, University Hospital Carl Gustav Carus, Technische Universität  
26 459 Dresden, Germany  
27 460 70 Department of Dermatology and NCT Heidelberg, Heidelberg University Hospital,  
28 461 Heidelberg, Germany  
29 462 71 Department of Dermatology, University Hospital Würzburg, Würzburg, Germany  
30 463 72 Department of Hematology, Oncology and Palliative Care, Katharinenhospital, Stuttgart,  
31 464 Germany  
32 465 73 Department of General, Visceral and Transplantation Surgery, RWTH Aachen, Aachen,  
33 466 Germany  
34 467 74 Department of Surgery, Universitätsmedizin Mannheim, Medical Faculty Mannheim,  
35 468 Heidelberg University, Mannheim, Germany  
36 469 75 Department of Thoracic Oncology, Thoraxklinik, Heidelberg University Hospital, Heidelberg,  
37 470 Germany  
38 471 76 Division of Solid Tumor Translational Oncology, West German Cancer Center, University  
39 472 Hospital Essen, Essen, Germany and DKTK, Essen, Germany  
40 473 77 Department of Neurosurgery, University Hospital LMU Munich, Munich, Germany  
41 474 78 Department of Internal Medicine II, University Hospital Frankfurt, Frankfurt, Germany  
42 475 79 Department of Hematology and Oncology, Zollernalb-Klinikum, Balingen, Germany  
43 476 80 Department of Radiation Oncology, Klinikum Ludwigshafen, Ludwigshafen, Germany  
44 477  
45 478  
46  
47  
48  
49  
50  
51  
52  
53  
54  
55  
56  
57  
58  
59  
60
